# Supplementary material
Source: PubMed Central journal article supplement (PMC2744899)
Supplement: NIHMS141501-supplement-1_si_001.pdf [file NIHMS141501-supplement-1_si_001.pdf]

## SUPPORTING INFORMATION

### Enhanced Photostability of Genetically Encodable Fluoromodules Based on Fluorogenic Cyanine Dyes and a Promiscuous Protein Partner

Nathaniel I. Shank<sup>1</sup>, Kimberly J. Zanotti<sup>1</sup>, Frederick Lanni<sup>2,3</sup>, Peter B. Berget<sup>2,3</sup>, Bruce A. Armitage<sup>1,3\*</sup>

Departments of Chemistry<sup>1</sup> and Biological Sciences<sup>2</sup> and Molecular Biosensor and Imaging Center<sup>3</sup>, Carnegie Mellon University, 4400 Fifth Avenue, Pittsburgh, PA 15213

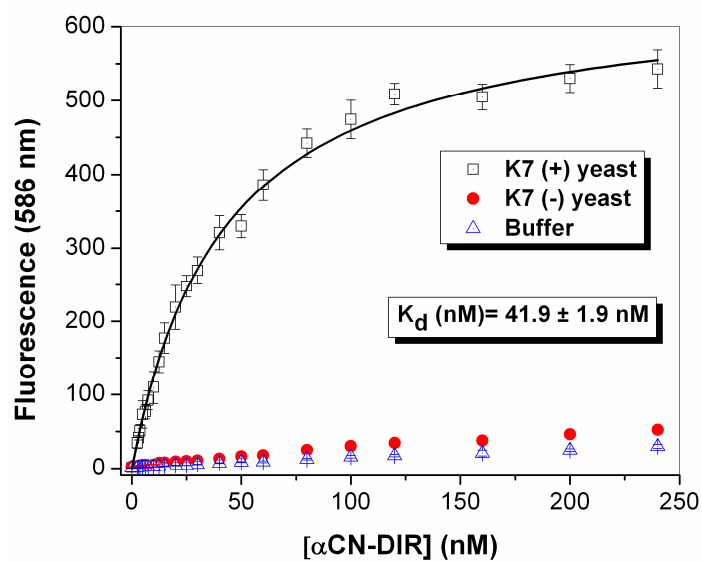

**Figure S1.** Fluorescence titration of  $\alpha$ -CN-DIR into yeast surface-displayed K7. Line is fit to a 1:1 binding model. Dye was titrated into yeast expressing K7 (squares), yeast not expressing K7 (circles), and buffer (triangles). Samples were excited at 534 nm.

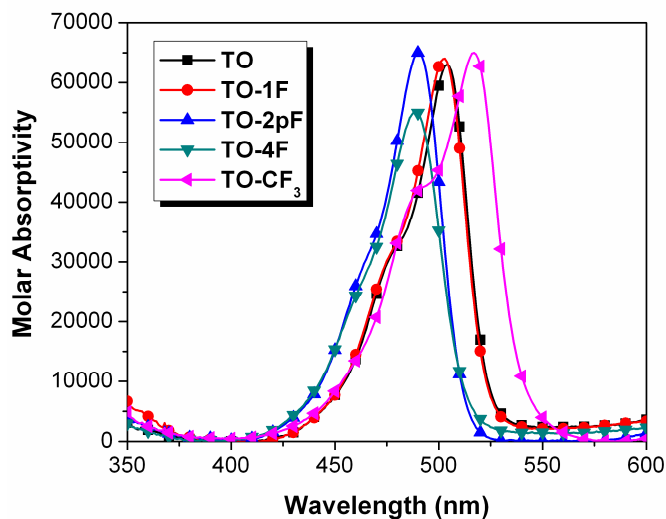

**Figure S2.** UV-vis absorbance spectra recorded for TO dyes in the presence of K7 protein. [Dye] = 300 nM, [K7] = 600 nM. The spectra show a blue shift when electron-withdrawing fluorine atoms are placed on the benzothiazole ring, but a red shift when a trifluoromethyl group is placed on the quinoline ring.

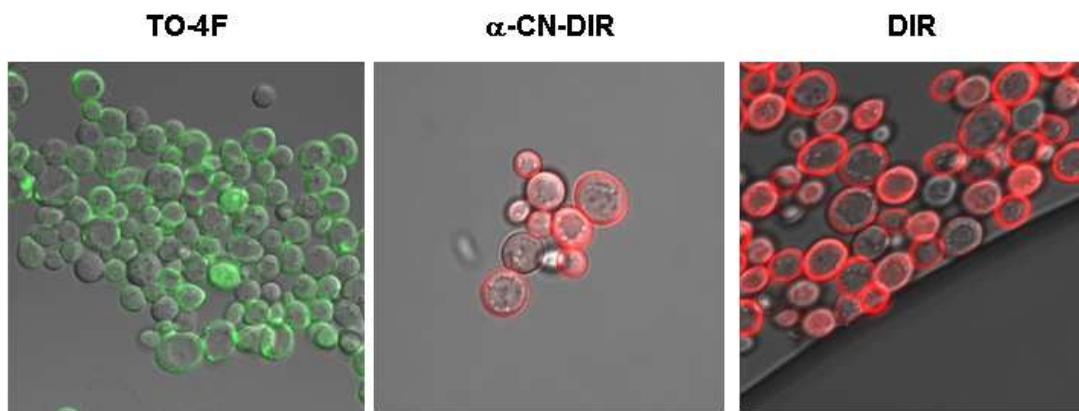

**Figure S3.** Merged fluorescence and differential interference contrast micrographs of yeast-displayed scFv K7 stained with 300 nM TO-4F (left), 200 nM  $\alpha$ -CN-DIR (middle) and 100 nM DIR (red).
